# Supplementary material
Source: PubMed Central journal article supplement (PMC10329458)
Supplement: NIHMS1909832-supplement-1.pdf [file NIHMS1909832-supplement-1.pdf]

**SUPPLEMENTARY MATERIAL**

**eTable 1. ULL-27 Questionnaire**

Physical domain: During the last four weeks, have you experienced difficulties because of your arm:

|                                                                                                   | Never | Rarely | Sometimes | Often | Always |
|---------------------------------------------------------------------------------------------------|-------|--------|-----------|-------|--------|
| 1. grasping high objects, taking down the washing?                                                |       |        |           |       |        |
| 2. staying in certain positions for a long time?                                                  |       |        |           |       |        |
| 3. felt that your arm is heavy, a burden or swollen?                                              |       |        |           |       |        |
| 4. felt that your arm is swollen?                                                                 |       |        |           |       |        |
| 5. dressing, putting on clothes, undressing?                                                      |       |        |           |       |        |
| 6. in getting to sleep: difficulty finding a comfortable place, in positioning your affected arm? |       |        |           |       |        |
| 7. in sleeping: waking often, with pain?                                                          |       |        |           |       |        |
| 8. in grasping objects: opening a door or putting a tap off?                                      |       |        |           |       |        |
| 9. holding objects: cutlery, a book, vase or plate etc.                                           |       |        |           |       |        |
| 10. walking, when your arm is heavy, a burden or swollen?                                         |       |        |           |       |        |
| 11. in washing, brushing your hair or putting on makeup?                                          |       |        |           |       |        |
| 12. taking public transport?                                                                      |       |        |           |       |        |
| 13. felt sensations of tingling, burning, tightness or itching?                                   |       |        |           |       |        |
| 14. felt your skin is swollen, tense or hard?                                                     |       |        |           |       |        |
| 15. in your working relationships and tasks?                                                      |       |        |           |       |        |

Psychological domain: During the last four weeks, have you, because of your arm:

|                                            | Never | Rarely | Sometimes | Often | Always |
|--------------------------------------------|-------|--------|-----------|-------|--------|
| 16. felt sad?                              |       |        |           |       |        |
| 17. felt discouraged?                      |       |        |           |       |        |
| 18. felt a lack of confidence in yourself? |       |        |           |       |        |
| 19. felt distressed?                       |       |        |           |       |        |

|                                   |  |  |  |  |  |
|-----------------------------------|--|--|--|--|--|
| 20. felt "well in yourself"?      |  |  |  |  |  |
| 21. felt like getting angry?      |  |  |  |  |  |
| 22. had confidence in the future? |  |  |  |  |  |

Social domain: During the last four weeks have you had difficulties because of your arm:

|                                                                                                        | Never | Rarely | Sometimes | Often | Always |
|--------------------------------------------------------------------------------------------------------|-------|--------|-----------|-------|--------|
| 23. taking advantage of good weather, spending time outside in the open air?                           |       |        |           |       |        |
| 24. in your personal projects: holidays, hobbies, etc.?                                                |       |        |           |       |        |
| 25. in your emotional life with your spouse or partner?                                                |       |        |           |       |        |
| 26. in your social life: going to a restaurant, cinema or theatre, a party or doing the shopping etc.? |       |        |           |       |        |
| 27. been afraid of looking at yourself in the mirror?                                                  |       |        |           |       |        |

**eTable 2. Pearson correlation between QOL domains.**

***QOL* quality of life**

| <b>Time point</b> | <b>Pearson correlation:<br/>Physical and<br/>psychological QOL</b> | <b>Pearson correlation:<br/>Physical and social<br/>QOL</b> | <b>Pearson correlation:<br/>Social and<br/>psychological QOL</b> |
|-------------------|--------------------------------------------------------------------|-------------------------------------------------------------|------------------------------------------------------------------|
| 6 months          | 0.63                                                               | 0.68                                                        | 0.61                                                             |
| 12 months         | 0.59                                                               | 0.65                                                        | 0.60                                                             |
| 18 months         | 0.62                                                               | 0.50                                                        | 0.44                                                             |
| 24 months         | 0.62                                                               | 0.50                                                        | 0.44                                                             |
